# Supplementary figures and images for: Attenuation of CD47-SIRPα Signal in Cholangiocarcinoma Potentiates Tumor-Associated Macrophage-Mediated Phagocytosis and Suppresses Intrahepatic Metastasis
Source: PubMed Central journal article supplement — Transl Oncol. 2018 Nov 9;12(2):217–25. doi: 10.1016/j.tranon.2018.10.007 (PMC6231245; doi:10.1016/j.tranon.2018.10.007), 2018-11-09

# Supplement Figure 1

## A

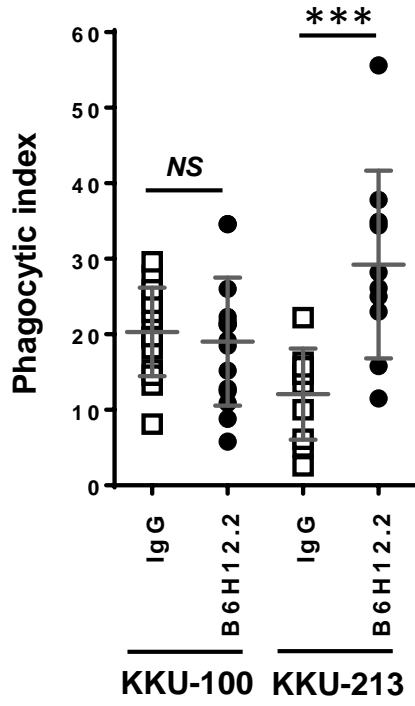

## B

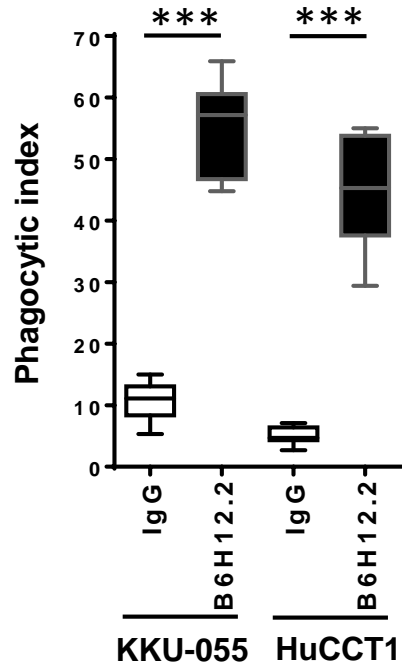

# Supplement Figure 2

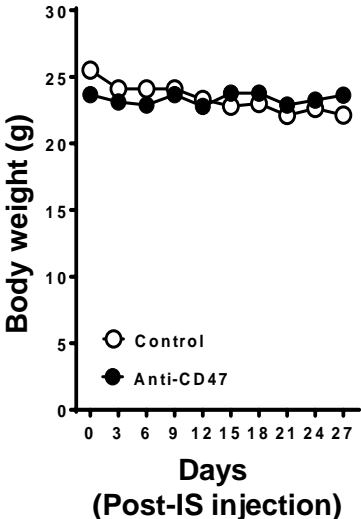

# Supplement Figure 3

## A

GM-CSF

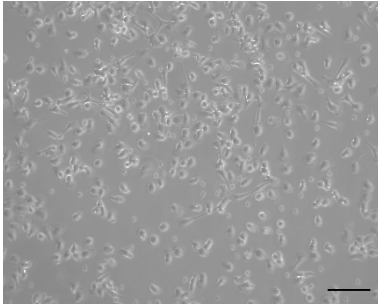

M-CSF

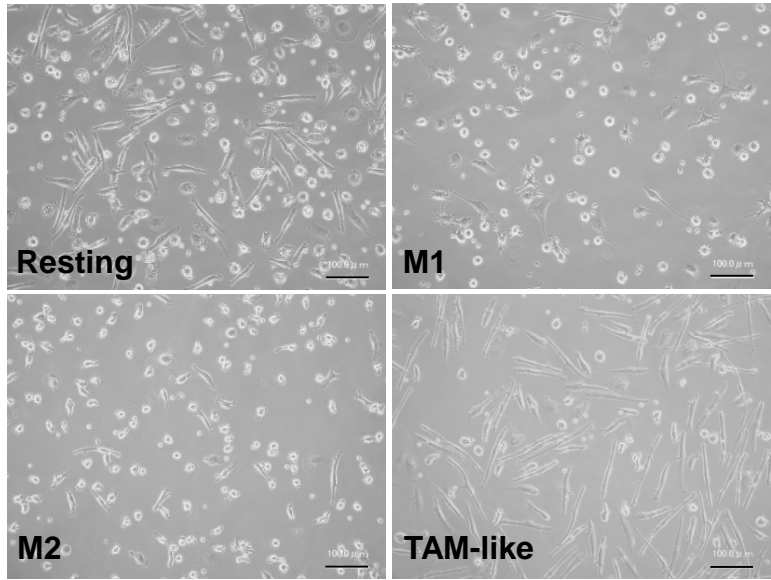

## B

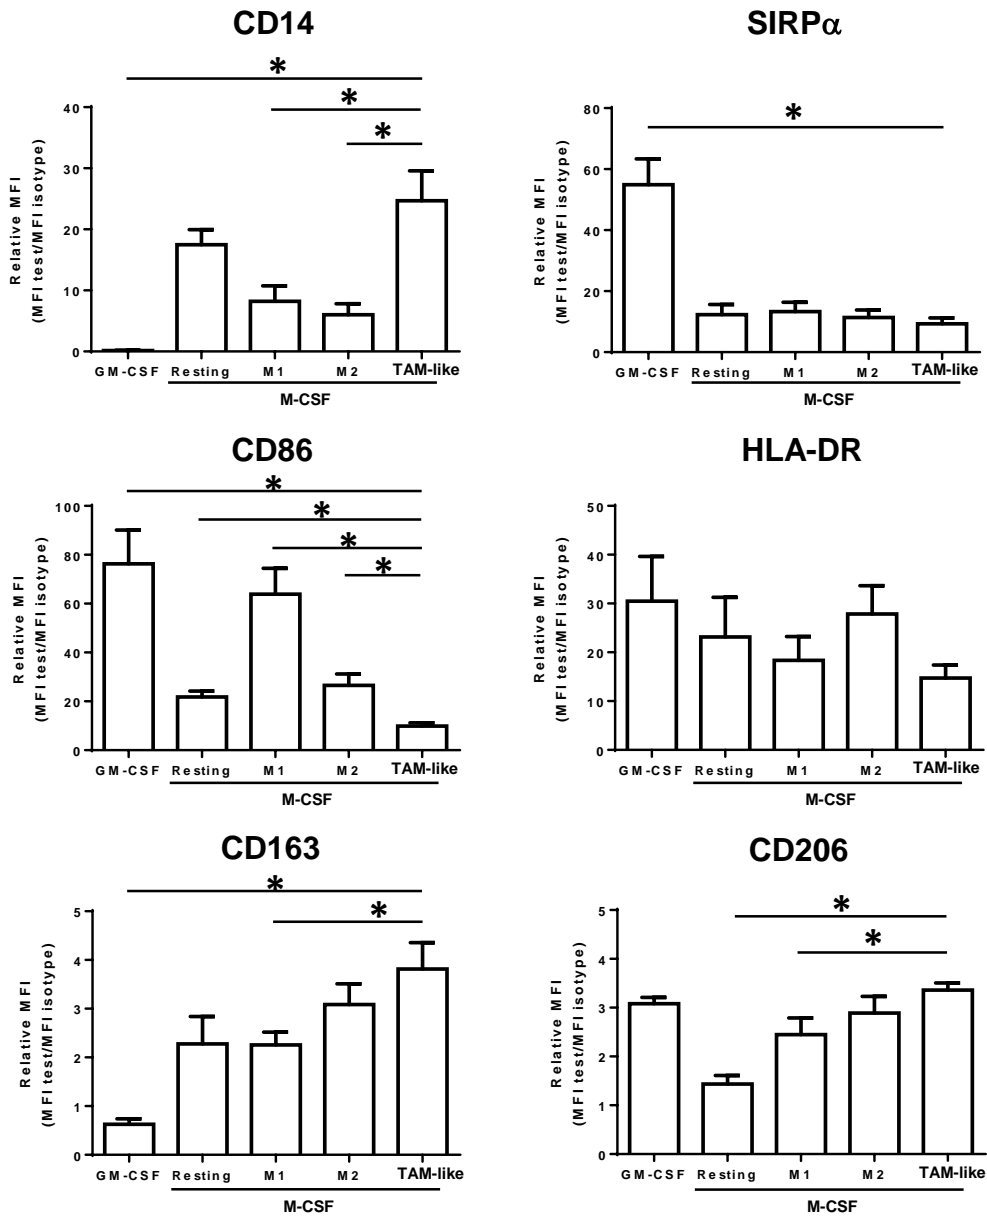

Supplement: mmc1.pdf [file mmc1.pdf]
